# Supplementary material
Source: Royal Society of Chemistry journal article supplement (doi:10.1039/d5ta09039c)
Supplement: d5ta09039c1.pdf [file d5ta09039c1.pdf]

### Supporting Information

Exploring the Electrocatalytic Oxygen Evolution/Urea Oxidation Activity of Solution-  
Combusted CuO/MnO<sub>2</sub>: Machine Learning Insights from OER Performance

L. Agah<sup>1</sup>, A. Vojdani Saghir<sup>1</sup>, M. Nazemi<sup>1</sup>, S. Mollazadeh Beidokhti<sup>1\*</sup>, J. Vahdati Khaki<sup>1\*</sup>, G.

Barati Darband<sup>1</sup>

<sup>1</sup>Department of Materials Engineering, Faculty of Engineering, Ferdowsi University of

Mashhad (FUM), Azadi Sq., Mashhad, Iran

\*Corresponding authors:

S. Mollazadeh Beidokhti: Phone: +985138805167, Fax: +985138805167, E-mail:

[mollazadeh.b@um.ac.ir](mailto:mollazadeh.b@um.ac.ir)

J. Vahdati Khaki: Phone: +985138805107, Fax: +985138805107, E-mail: [vahdati@um.ac.ir](mailto:vahdati@um.ac.ir)

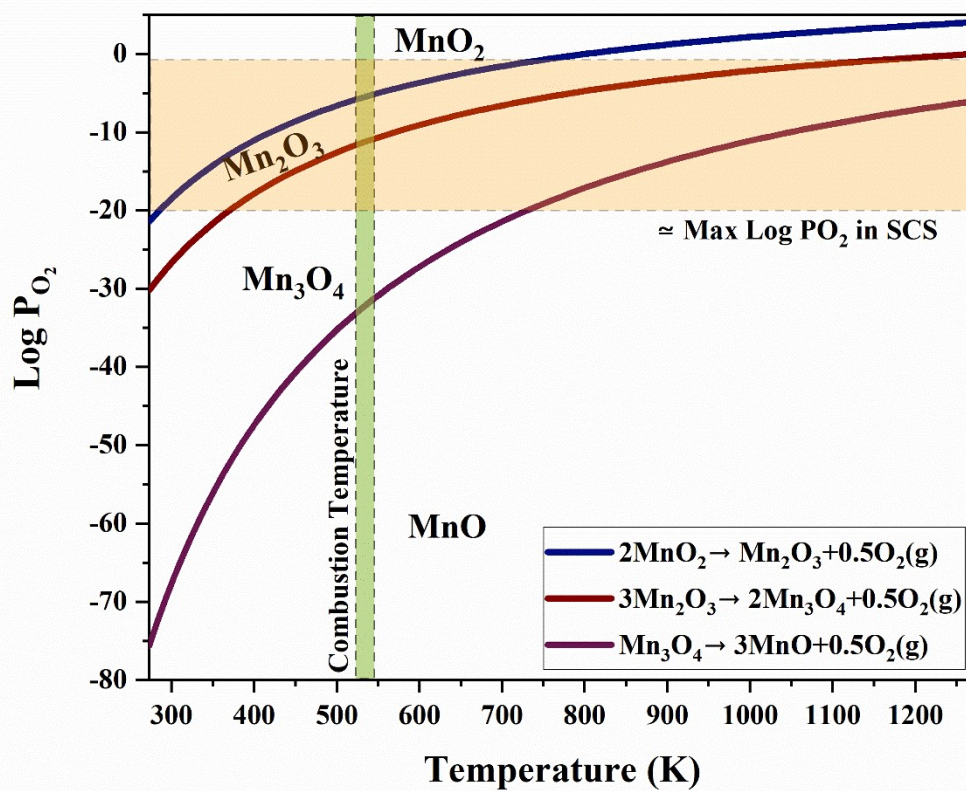

Fig. S1. Thermodynamic stability diagram of Mn-oxides system.

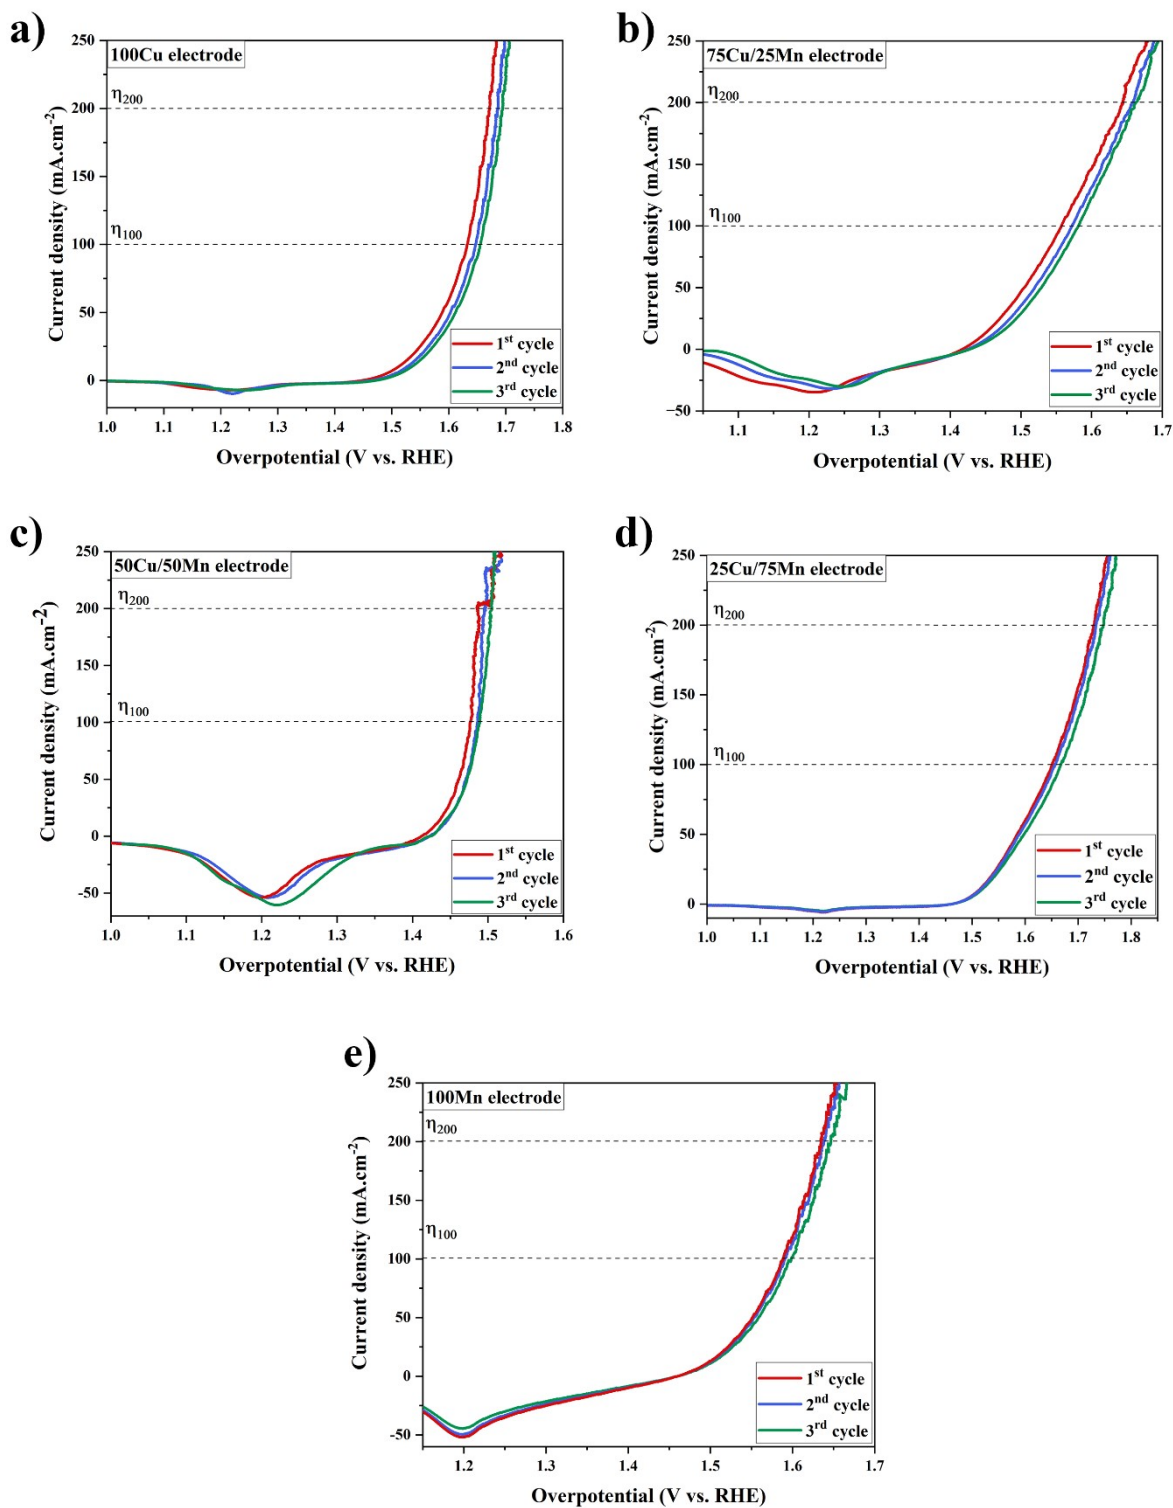

**Fig. S2.** LSV curves of all fabricated samples recorded over three consecutive cycles in 1 M KOH at a scan rate of  $5 \text{ mV}\cdot\text{s}^{-1}$ , demonstrating the cycling stability and reproducibility of the electrocatalytic response.

**Table S1.** Summary of statistical and structural similarity metrics between real and synthetic datasets.

| Metric                            | Desirable / Optimaal range                                        | Observed value                                                              |
|-----------------------------------|-------------------------------------------------------------------|-----------------------------------------------------------------------------|
| Per-feature KS tests              | $p > 0.05$                                                        | $0.14 < p < 0.91$                                                           |
| Correlation structure             | mean $ \Delta\text{Corr}  \approx 0$                              | mean $ \Delta\text{Corr}  = 0.299$                                          |
| Mahalanobis distances             | $\mu(\text{real}) \approx \mu(\text{synthetic})$ , small $\sigma$ | Real: $\mu = 2.37, \sigma = 0.12$<br>Synthetic: $\mu = 2.55, \sigma = 0.47$ |
| Classifier two-sample test (C2ST) | $\text{AUC} \approx 0.5$                                          | $\text{AUC} = 0.557 \pm 0.230$                                              |

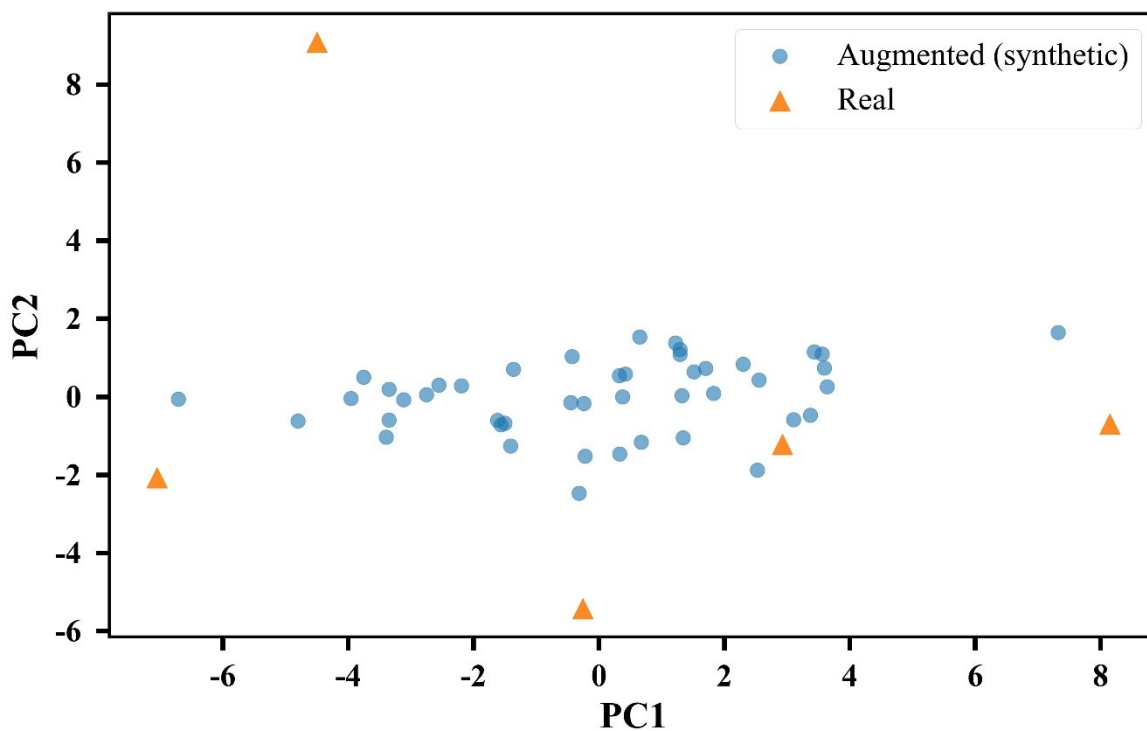

**Figure S3.** Visualization of real and synthetic samples in the first two principal component (PC) dimensions, showing that the synthetic data approximate the distribution of the real dataset.

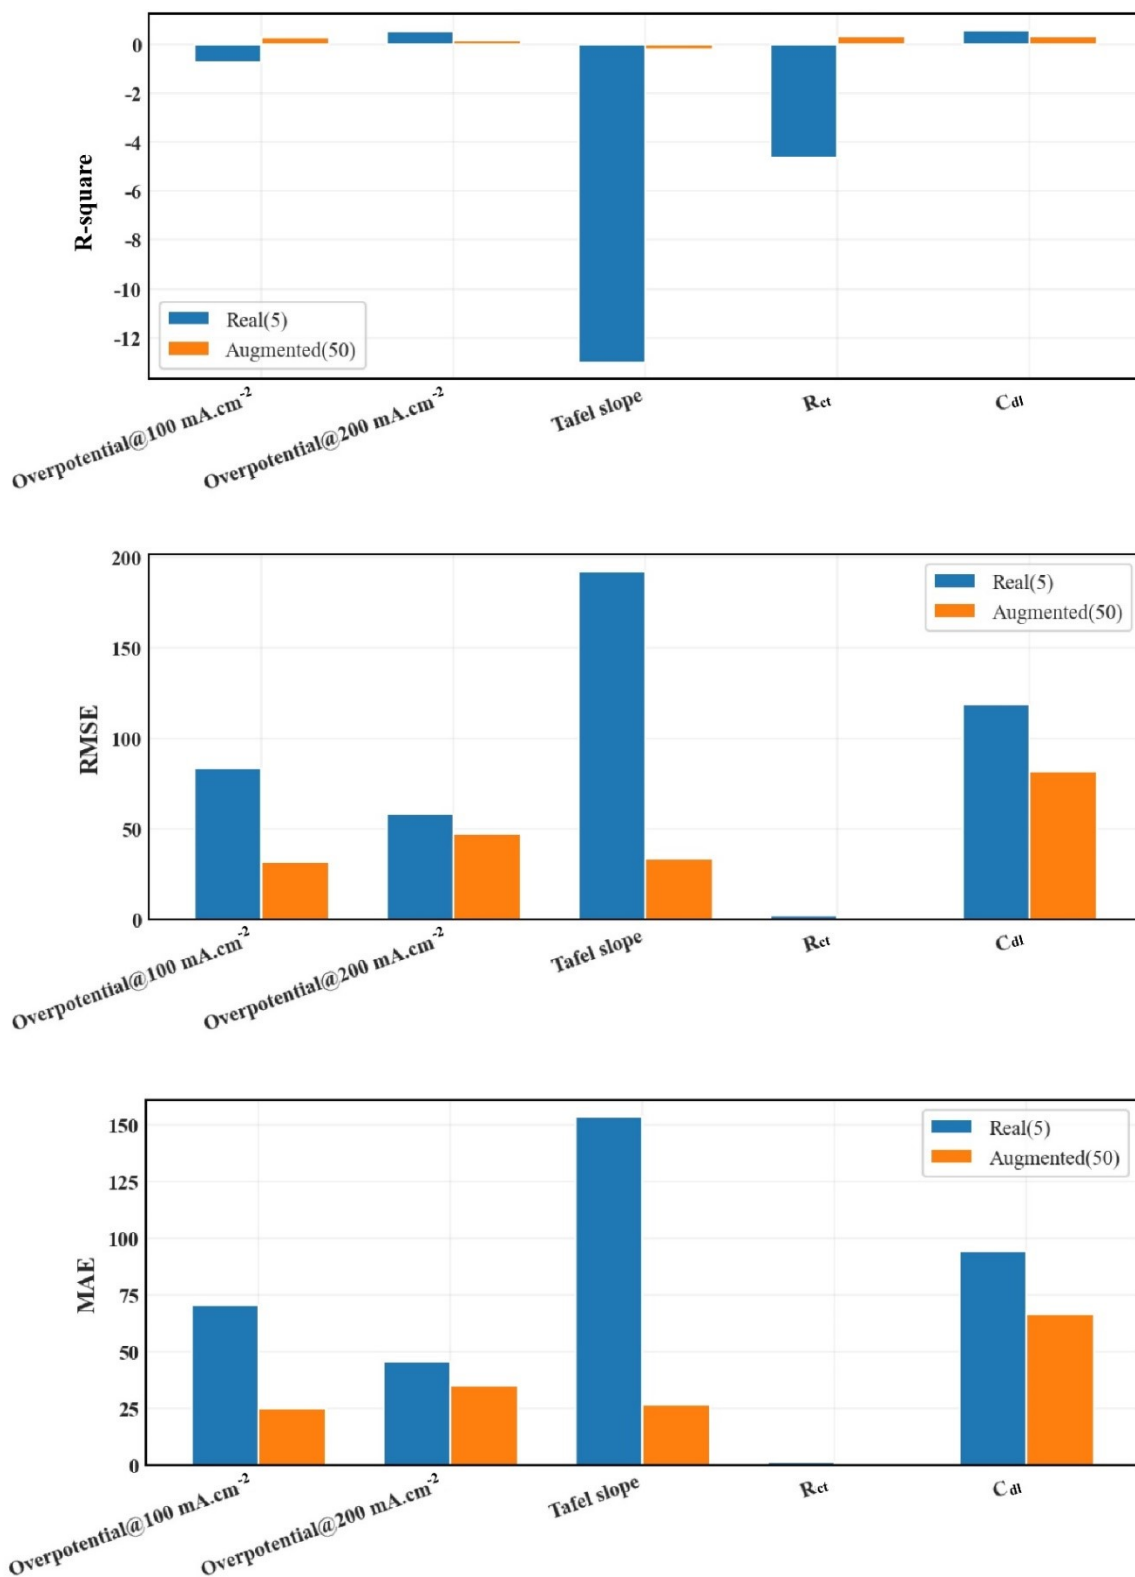

**Fig. S4.** Performance comparison between models trained on real (5 samples) and augmented (50 samples) data using R<sup>2</sup>, RMSE, and MAE metrics.
